# Supplementary material
Source: PubMed Central journal article supplement (PMC5588657)

Supplemental Table 1. Distribution of fails by fish oil intake in Upstate KIDS

## Fish oil during pregnancy

## Age of Screen

| n (%)                | 4-6       | 8         | 12        | 18        | 24        | 30        | 36        |
|----------------------|-----------|-----------|-----------|-----------|-----------|-----------|-----------|
| Any domain fail      | 40 (5.7%) | 52 (8.7%) | 49 (9.2%) | 24 (5.3%) | 25 (6.1%) | 21 (5.3%) | 16 (4.3%) |
| Fine motor fail      | 22 (3.2%) | 9 (1.5%)  | 9 (1.7%)  | 9 (2.0%)  | 5 (1.2%)  | 8 (2.0%)  | 7 (1.9%)  |
| Gross motor fail     | 19 (2.7%) | 12 (2.0%) | 24 (4.5%) | 16 (3.5%) | 8 (2.0%)  | 13 (3.3%) | 5 (1.3%)  |
| Communication fail   | 8 (1.1%)  | 29 (4.8%) | 22 (4.1%) | 8 (1.8%)  | 16 (3.9%) | 11 (2.8%) | 7 (1.9%)  |
| Personal-social fail | 14 (2.0%) | 18 (3.0%) | 11 (2.1%) | 11 (2.4%) | 11 (2.7%) | 11 (2.8%) | 8 (2.1%)  |
| Problem solving fail | 11 (1.6%) | 6 (1.0%)  | 14 (2.6%) | 8 (1.8%)  | 5 (1.2%)  | 6 (1.5%)  | 3 (0.8%)  |

## No Fish oil during pregnancy

## Age of Screen

| n (%)                | 4-6        | 8          | 12         | 18         | 24         | 30         | 36        |
|----------------------|------------|------------|------------|------------|------------|------------|-----------|
| Any domain fail      | 295 (7.9%) | 251 (8.6%) | 205 (8.3%) | 132 (6.2%) | 163 (8.6%) | 125 (6.7%) | 92 (5.4%) |
| Fine motor fail      | 128 (3.4%) | 67 (2.3%)  | 21 (0.8%)  | 52 (2.4%)  | 61 (3.2%)  | 48 (2.6%)  | 50 (2.9%) |
| Gross motor fail     | 122 (3.3%) | 59 (2.0%)  | 102 (4.1%) | 48 (2.3%)  | 48 (2.5%)  | 64 (3.4%)  | 35 (2.1%) |
| Communication fail   | 77 (2.1%)  | 104 (3.6%) | 90 (3.6%)  | 60 (2.8%)  | 104 (5.5%) | 71 (3.8%)  | 42 (2.5%) |
| Personal-social fail | 102 (2.7%) | 107 (3.7%) | 64 (2.6%)  | 55 (2.6%)  | 67 (3.5%)  | 44 (2.3%)  | 39 (2.3%) |
| Problem solving fail | 93 (2.5%)  | 54 (1.9%)  | 59 (2.4%)  | 59 (2.8%)  | 34 (1.8%)  | 64 (3.4%)  | 40 (2.3%) |

\*Percentages out of valid responses.

Supplemental Figure 1. Probability of problem solving fails by fish oil intake in Upstate KIDS from 4 through 36 months of age

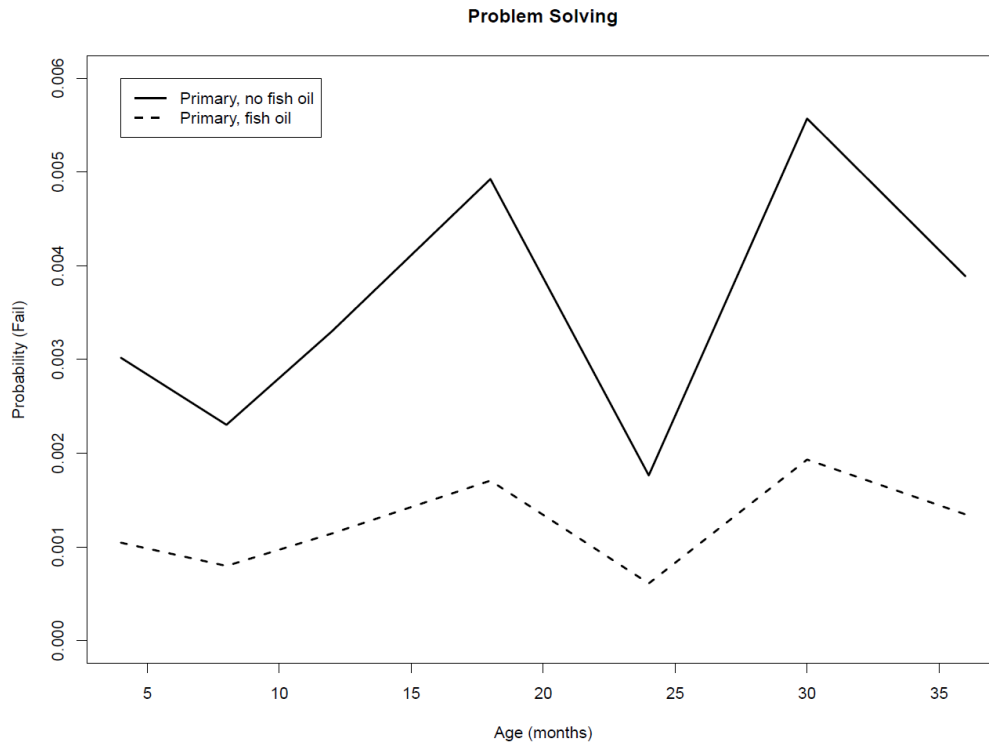

Supplement: NIHMS899952-supplement-supplement_1.pdf [file NIHMS899952-supplement-supplement_1.pdf]
